# Supplementary material for: Recyclable trypsin immobilized magnetic nanoparticles based on hydrophilic polyethylenimine modification and their proteolytic characteristics
Source: Royal Society of Chemistry journal article supplement (doi:10.1039/c7ay02418e), 2017-12-22
Supplement: c7ay02418e1.pdf [file c7ay02418e1.pdf]

# Supplementary Information

## Recyclable

trypsin immobilized magnetic nanoparticle based on hydrophilic  
polyethylenimine modification and its proteolytic characteristics

Lingyi Zhang <sup>\*1</sup>, Bingbing Wang<sup>1</sup>, Shulei Wang, Weibing Zhang

Shanghai Key Laboratory of Functional Materials Chemistry, School of Chemistry &  
Molecular Engineering, East China University of Science and Technology, Shanghai  
200237, P. R. China

\*Corresponding author: E-mail: [zhanglingyi@ecust.edu.cn](mailto:zhanglingyi@ecust.edu.cn); Fax: +86-021-64233161;

Tel: +86-021-64253977

<sup>1</sup> These two authors contributed equally

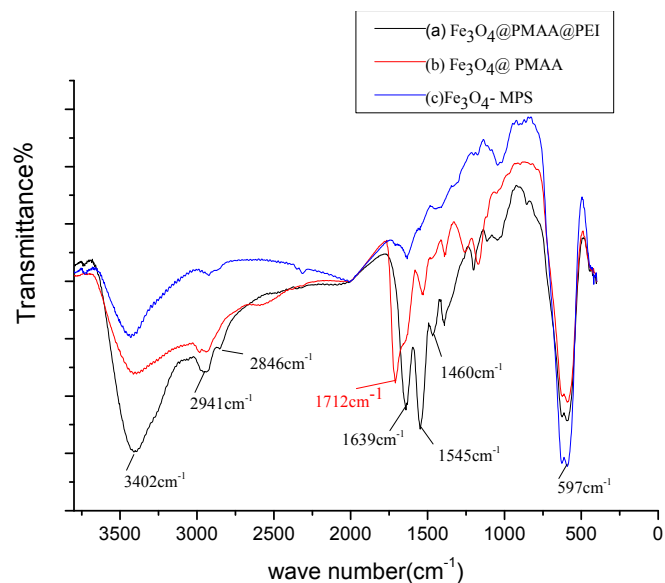

FigureS-1. Representative FT-IR spectra of  $\text{Fe}_3\text{O}_4@\text{PMAA}@\text{PEI}$  (a),  $\text{Fe}_3\text{O}_4@\text{PMAA}$  (b),  $\text{Fe}_3\text{O}_4$ -MPS (c)

Table S-1. Elemental composition of  $\text{Fe}_3\text{O}_4@\text{PMAA}@\text{PEI}$  and  $\text{Fe}_3\text{O}_4@\text{PMAA}$  obtained from elemental analysis

| nanoparticles                                  | Weight/mg | N(%) | C(%)  | H(%) |
|------------------------------------------------|-----------|------|-------|------|
| $\text{Fe}_3\text{O}_4@\text{PMAA}$            | 2.231     | 1.35 | 15.77 | 2.28 |
|                                                | 2.537     | 1.27 | 15.69 | 2.24 |
| $\text{Fe}_3\text{O}_4@\text{PMAA}@\text{PEI}$ | 2.293     | 9.90 | 23.21 | 5.58 |
|                                                | 2.243     | 9.73 | 23.01 | 5.70 |

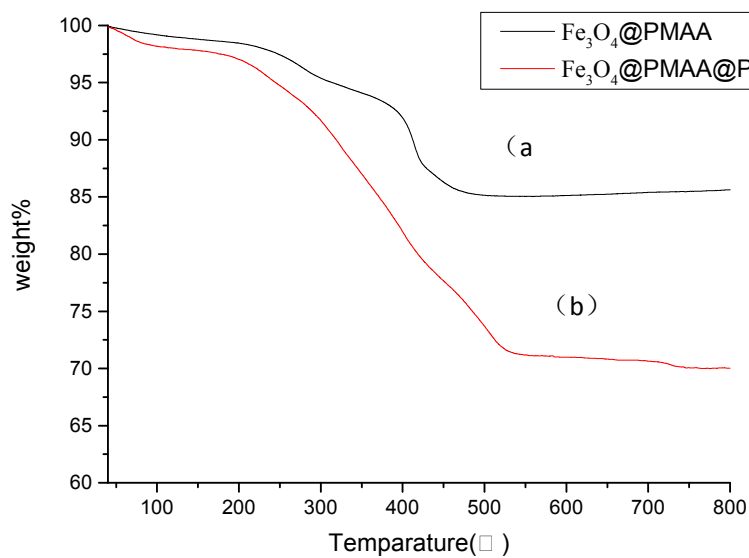

FigureS-2: TGA curves of  $\text{Fe}_3\text{O}_4@\text{PMAA}$  (a),  $\text{Fe}_3\text{O}_4@\text{PMAA}@\text{PEI}$ (b)

### Measurement of amount of trypsin immobilized in supports

Protein standard solution was obtained by diluting 8mg/mL standard protein into 32.5, 62.5, 125, 250, 500  $\mu\text{g/mL}$ . A volume of 100  $\mu\text{L}$  supernatant solution collected after immobilization and standard protein solution were mixed with 2mL working reagent and the mixture was kept at 37°C for 30 minutes. The absorbance was measured at 562nm. Standard curve was shown in Figure S-3. By comparing amounts of trypsin before and after immobilization, the results indicate that the concentration immobilized on the surface of  $\text{Fe}_3\text{O}_4@\text{PMAA}$  and  $\text{Fe}_3\text{O}_4@\text{PMAA}@\text{PEI}$  are about 0.080mg/mg and 0.170mg/mg.

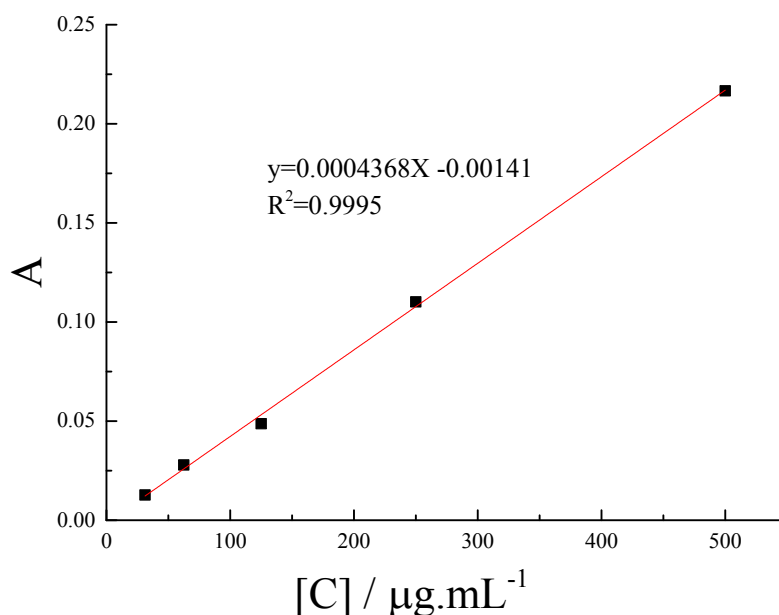

Figure S-3. Standard curve of standard protein by BCA protein assay

Table S-2. The identified peptide mass values of BSA, myoglobin and Cyt-C.

| protein | Digestion method                    | position | Observed Peptide mass | Amino acid sequence |
|---------|-------------------------------------|----------|-----------------------|---------------------|
| BSA     | $\text{Fe}_3\text{O}_4@\text{PMAA}$ | 25–34    | 1193.6609             | DTHKSEIAHR          |
|         |                                     | 35–44    | 1249.6703             | FKDLGEEHFK          |
|         |                                     | 66–75    | 1163.6603             | LVNELTEFAK          |
|         |                                     | 76–88    | 1462.8369             | TCVADESHAGCEK       |
|         |                                     | 89–100   | 1419.7465             | SLHTLFGDELCK        |
|         |                                     | 139–155  | 2020.0645             | LKPDPNTLCDEFKADEK   |
|         |                                     | 161–167  | 927.5341              | YLYEIAR             |
|         |                                     | 161–168  | 1083.6326             | YLYEIARR            |
|         |                                     | 168–183  | 2045.1194             | RHPYFYAPELLEYANK    |

@PEI-tryisin

|           |                                      |         |           |                                     |
|-----------|--------------------------------------|---------|-----------|-------------------------------------|
|           |                                      | 184-197 | 1747.8041 | YNGVFQECCQAEDK                      |
|           |                                      | 223-232 | 1195.6573 | CASIQKFGER                          |
|           |                                      | 264-280 | 2113.9900 | VHKECCHGDLLECADDR                   |
|           |                                      | 267-280 | 1749.7765 | ECCHGDLLECADDR                      |
|           |                                      | 267-285 | 2248.0652 | ECCHGDLLECADDRADLAK                 |
|           |                                      | 286-297 | 1443.7657 | YICDNQDTISSK                        |
|           |                                      | 298-309 | 1532.8416 | LKECCDKP LLEK                       |
|           |                                      | 347-359 | 1567.8060 | DAFLGSFLYEYSR                       |
|           |                                      | 360-371 | 1439.8733 | RHPEYAVSVLLR                        |
|           |                                      | 361-371 | 1283.7683 | HPEYAVSVLLR                         |
|           |                                      | 375-386 | 1501.8220 | EYEATLEECCA K                       |
|           |                                      | 387-401 | 1795.8978 | DDPHACYSTVFDK LK                    |
|           |                                      | 402-412 | 1305.7659 | HLVDEPQNLIK                         |
|           |                                      | 413-420 | 1068.4735 | QNCDQFEK                            |
|           |                                      | 413-433 | 2529.3438 | QNCDQFEKLG EYGFQNALIVR              |
|           |                                      | 421-433 | 1479.8612 | LGEYGFQNALIVR                       |
|           |                                      | 437-451 | 1640.0172 | KVPQVSTPTLVEVSR                     |
|           |                                      | 460-468 | 1166.5527 | CCTKPESER                           |
|           |                                      | 460-482 | 1724.9095 | CCTKPESERMPCTEDYLSLILNR             |
|           |                                      | 469-482 | 1724.9095 | MPCTEDYLSLILNR                      |
|           |                                      | 483-495 | 1539.8702 | LCVLHEKTPVSEK                       |
|           |                                      | 499-507 | 1138.5521 | CCTESLVNR                           |
|           |                                      | 508-523 | 1881.0074 | RPCFSALTPDETYVPK                    |
|           |                                      | 524-544 | 2498.3250 | AFDEKLFTHADICTLPDTEK                |
|           |                                      | 529-544 | 1908.0061 | LFTFHADICTLPDTEK                    |
|           |                                      | 549-561 | 1504.8132 | QTALVELLKHKPK                       |
|           |                                      | 569-580 | 1399.7452 | TVMENFVAFVDK                        |
|           |                                      | 581-597 | 1927.8894 | CCAADDKEACFAVEGPK                   |
|           |                                      | 2-17    | 1816.0238 | GLSDGEWQQVLNVWGK                    |
|           |                                      | 2-32    | 3403.9944 | GLSDGEWQQVLNVWGKVEADIAGHGQEV<br>LIR |
|           |                                      | 18-32   | 1606.9832 | VEADIAGHGQEV LIR                    |
|           |                                      | 33-43   | 1271.7356 | LFTGHPETLEK                         |
|           |                                      | 33-46   | 1661.9453 | LFTGHPETLEKFDK                      |
|           |                                      | 65-78   | 1378.9218 | HGTVVLTALGGILK                      |
|           |                                      | 65-79   | 1507.0221 | HGTVVLTALGGILKK                     |
|           |                                      | 80-97   | 1982.1962 | KGHHEAELKPLAQSHATK                  |
|           |                                      | 81-97   | 1854.0931 | GHHEAELKPLAQSHATK                   |
|           |                                      | 104-119 | 1885.1412 | YLEFISDAIHVLH SK                    |
| myoglobin | Fe <sub>3</sub> O <sub>4</sub> @PMAA | 120-134 | 1502.7552 | HPGDFGADAQGAMTK                     |
|           | @PEI-tryisin                         | 120-140 | 2248.3535 | HPGDFGADAQGAMTKALELFR               |
|           |                                      | 135-146 | 1360.8427 | ALELFRNDIAAK                        |

|        |                                                      |                  |           |                          |
|--------|------------------------------------------------------|------------------|-----------|--------------------------|
|        |                                                      | 147-154          | 941.5123  | YKELGFQG                 |
|        |                                                      | 47-57            | 1361.8368 | FKHLKTEAEMK              |
|        |                                                      | 58-79            | 2278.3574 | ASEDLKKHGTVVLTALGGILKK   |
|        |                                                      | 79-97            | 2110.2898 | KKGHHEAELKPLAQSHATK      |
|        |                                                      | 135-154          | 2283.3765 | ALELFRNDIAAKYKELGFQG     |
| Cyt-c  | Fe <sub>3</sub> O <sub>4</sub> @PMAA<br>@PEI-trypsin | 1-14             | 1606.8995 | MGDVEKGKKIFVQK           |
|        |                                                      | 2-9              | 861.0699  | GDVEKGKK                 |
|        |                                                      | 9-23             | 1875.7871 | KIFVQKCAQCHTVEK          |
|        |                                                      | 27-39            | 1433.8022 | HKTGPNLHGLFGR            |
|        |                                                      | 29-39            | 1168.6924 | TGPNLHGLFGR              |
|        |                                                      | 29-40            | 1296.7305 | TGPNLHGLFGRK             |
|        |                                                      | 40-54            | 1584.8295 | KTGQAPGFSYTDANK          |
|        |                                                      | 41-54            | 1456.7212 | TGQAPGFSYTDANK           |
|        |                                                      | 41-56            | 1698.8240 | TGQAPGFSYTDANKNK         |
|        |                                                      | 55-73            | 2252.0642 | NKGITWGEETLMEYLENPK      |
|        |                                                      | 57-73            | 2009.9917 | GITWGEETLMEYLENPK        |
|        |                                                      | 57-80            | 2797.5027 | GITWGEETLMEYLENPKKYIPGTK |
|        |                                                      | 75-87            | 1438.8290 | YIPGTKMIFAGIK            |
|        |                                                      | 89-101           | 1562.9208 | KGEREDLIAYLKK            |
|        |                                                      | 90-100           | 1306.7051 | GEREDLIAYLK              |
| 90-101 | 1434.8154                                            | GEREDLIAYLKK     |           |                          |
| 90-105 | 1850.0038                                            | GEREDLIAYLKKATNE |           |                          |
| 93-100 | 964.5173                                             | EDLIAYLK         |           |                          |

| Protein | Digestion method            | position | Observed peptide mass | Amino acid sequence    |
|---------|-----------------------------|----------|-----------------------|------------------------|
| BSA     | In-solution based digestion | 25-34    | 1193.6558             | DTHKSEIAHR             |
|         |                             | 35-44    | 1249.6768             | FKDLGEEHFK             |
|         |                             | 66-75    | 1163.6729             | LVNELTEFAK             |
|         |                             | 76-88    | 1463.6536             | TCVADESHAGCEK          |
|         |                             | 89-100   | 1419.7627             | SLHTLFGDELCK           |
|         |                             | 118-138  | 2541.3767             | QEPERNECFLSHKDDSPDLPK  |
|         |                             | 161-167  | 927.5619              | YLYEIAR                |
|         |                             | 161-168  | 1083.6418             | YLYEIARR               |
|         |                             | 198-211  | 1662.0239             | GACLLPKIETMREK         |
|         |                             | 205-211  | 906.5392              | IETMREK                |
|         |                             | 264-280  | 2114.0164             | VHKECCHGDLLECADDR      |
|         |                             | 264-285  | 2612.3508             | VHKECCHGDLLECADDRADLAK |
|         |                             | 347-359  | 1567.8337             | DAFLGSFLYEYSR          |
|         |                             | 360-371  | 1439.8810             | RHPEYAVSVLLR           |
|         |                             | 375-386  | 1501.8529             | EYEATLEECCA            |

|           |                             | 413-433  | 2529.3928             | QNCDQFEKLG EYGFQNALIVR |
|-----------|-----------------------------|----------|-----------------------|------------------------|
|           |                             | 437-451  | 1479.8773             | LGEYGFQNALIVR          |
|           |                             | 469-482  | 1724.9436             | MPCTEDYLSLILNR         |
|           |                             | 483-498  | 1868.1522             | LCVLHEKTPVSEKVTK       |
|           |                             | 499-507  | 1138.5936             | CCTESLVNR              |
|           |                             | 508-523  | 1881.0475             | RPCFSALTPDETYVPK       |
| Myoglobin | In-solution based digestion | 18-32    | 1607.5985             | VEADIAGHGQEVLR         |
|           |                             | 33-43    | 1271.7577             | LFTGHPETLEK            |
|           |                             | 33-46    | 1661.9861             | LFTGHPETLEKFDK         |
|           |                             | 47-57    | 1361.8596             | FKHLKTEAEMK            |
|           |                             | 65-78    | 1378.9500             | HGTVVLTALGGILK         |
|           |                             | 65-79    | 1507.0597             | HGTVVLTALGGILKK        |
|           |                             | 79-97    | 2110.3472             | KKGHHEAELKPLAQSHATK    |
|           |                             | 80-97    | 1982.2474             | KGHHEAELKPLAQSHATK     |
|           |                             | 81-97    | 1854.1326             | GHHEAELKPLAQSHATK      |
|           |                             | 104-119  | 1885.1884             | YLEFISDAIIHVLHSK       |
|           |                             | 120-134  | 1502.7954             | HPGDFGADAQGAMTK        |
|           |                             | 120-140  | 2248.3784             | HPGDFGADAQGAMTKALELFR. |
|           |                             | 135-154  | 2283.4250             | ALELFRNDIAAKYKELGFQG   |
|           |                             | 147-154  | 941.5297              | YKELGFQG               |
| Cyt-c     | In-solution based digestion | 27-39    | 1433.8340             | HKTGPNLHGLFGR          |
|           |                             | 27-40    | 1561.9412             | HKTGPNLHGLFGRK         |
|           |                             | 29-39    | 1168.6919             | TGPNLHGLFGR            |
|           |                             | 40-54    | 1584.8112             | KTGQAPGFSYTDANK        |
|           |                             | 41-54    | 1456.7118             | TGQAPGFSYTDANK         |
|           |                             | 57-73    | 2010.0289             | GITWGEETLMEYLENPK      |
|           |                             | 57-74    | 2138.1426             | GITWGEETLMEYLENPKK     |
|           |                             | 89-101   | 1562.9460             | KGEREDLIAYLKK          |
|           |                             | 90-100   | 1306.7406             | K.GEREDLIAYLK.K        |
|           |                             | 90-101   | 1434.8470             | K.GEREDLIAYLKK.A       |
|           |                             | 29-40    | 1296.7582             | TGPNLHGLFGRK           |
| Protein   | Digestion method            | position | Observed peptide mass | Amino acid sequence    |
|           |                             | 24-34    | 1349.7852             | RDTHKSEIAHR            |
|           |                             | 25-34    | 1193.7000             | DTHKSEIAHR             |
|           |                             | 35-44    | 1249.7152             | FKDLGEEHFK             |
|           |                             | 65-75    | 1163.7159             | LVNELTEFAK             |
|           |                             | 76-88    | 1463.7452             | TCVADESHAGCEK          |
|           |                             | 89-100   | 1419.8082             | SLHTLFGDELCK           |
|           |                             | 118-138  | 2541.3923             | QEPERNECFLSHKDDSPDLPK  |
|           |                             | 139-155  | 2020.1472             | LKPDNTLCDEFKADEK       |
|           |                             | 161-167  | 927.5651              | YLYEIAIR               |

|     |                                      |         |           |                        |
|-----|--------------------------------------|---------|-----------|------------------------|
|     |                                      | 168-183 | 2045.1848 | RHPYFYAPELLYYANK       |
|     |                                      | 184-197 | 1746.9583 | YNGVFQECCQAEDK         |
|     |                                      | 198-211 | 1662.0653 | GACLLPKIETMREK         |
|     |                                      | 205-211 | 906.5421  | IETMREK                |
|     |                                      | 205-218 | 1590.8683 | IETMREKVLASSAR         |
|     |                                      | 242-248 | 847.5549  | LSQKFPK                |
|     |                                      | 264-280 | 2114.0737 | VHKECCHGDLLECADDR      |
|     |                                      | 264-285 | 2612.3999 | VHKECCHGDLLECADDRADLAK |
|     |                                      | 267-280 | 1749.8380 | ECCHGDLLECADDR         |
|     |                                      | 267-285 | 2248.1396 | ECCHGDLLECADDRADLAK    |
|     |                                      | 286-297 | 1442.8533 | YICDNQDTISSK           |
|     |                                      | 298-309 | 1532.9083 | LKECCDKPLLEK           |
| BSA |                                      | 347-359 | 1567.8718 | DAFLGSFLYEYSR          |
|     |                                      | 360-371 | 1439.9355 | RHPEYAVSVLLR           |
|     |                                      | 361-371 | 1283.8180 | HPEYAVSVLLR            |
|     |                                      | 375-386 | 1501.8907 | EYEATLEECCA            |
|     | regenerative                         | 387-399 | 1554.8951 | DDPHACYSTVFDK          |
|     | Fe <sub>3</sub> O <sub>4</sub> @PMAA | 402-412 | 1305.8090 | HLVDEPQNLK             |
|     | @PEI-trypsin                         |         |           |                        |
|     |                                      | 421-433 | 1479.9226 | LGEYGFQNALIVR          |
|     |                                      | 437-451 | 1640.0813 | KVPQVSTPTLVEVSR        |
|     |                                      | 460-468 | 1166.5879 | CCTKPESER              |
|     |                                      | 469-482 | 1724.9847 | MPCTEDYLSLILNR         |
|     |                                      | 483-489 | 898.5428  | LCVLHEK                |
|     |                                      | 496-507 | 1466.7468 | VTKCCTESLVNR           |
|     |                                      | 499-507 | 1138.5889 | CCTESLVNR              |
|     |                                      | 508-523 | 1881.0902 | RPCFSALTPDETYVPK       |
|     |                                      | 529-544 | 1908.0991 | LFTFHADICTLPDTEK       |
|     |                                      | 549-561 | 1504.8798 | QTALVELLKHKPK          |
|     |                                      | 581-597 | 1927.9650 | CCAADDKEACFAVEGPK      |

| Protein | Digestion method                     | position | Observed mass | Amino acid sequence          |
|---------|--------------------------------------|----------|---------------|------------------------------|
|         |                                      | 1-24     | 2877.6711     | MKWVTFISLLLLFSSAYSRGV<br>FRR |
|         |                                      | 25-34    | 1193.7222     | DTHKSEIAHR                   |
|         |                                      | 35-44    | 1249.7229     | FKDLGEEHFK                   |
|         |                                      | 76-88    | 1462.9528     | TCVADESHAGCEK                |
|         |                                      | 89-100   | 1419.8207     | SLHTLFGDELCK                 |
|         |                                      | 89-105   | 1946.2227     | SLHTLFGDELCKVASLR            |
|         |                                      | 161-167  | 927.5721      | YLYEIAR                      |
|         |                                      | 161-168  | 1083.7090     | YLYEIARR                     |
| BSA     | Fe <sub>3</sub> O <sub>4</sub> @PMAA | 205-220  | 1891.1145     | IETMREKVLASSARQR             |

-trypsin

|           |                                      |         |           |                                       |
|-----------|--------------------------------------|---------|-----------|---------------------------------------|
|           |                                      | 264-285 | 2612.4692 | VHKECCHGDLLECADDRADLAK                |
|           |                                      | 286-297 | 1443.9121 | YICDNQDTISSK                          |
|           |                                      | 341-359 | 2301.3511 | NYQEAKDAFLGSFLYEYSR                   |
|           |                                      | 347-359 | 1567.9141 | DAFLGSFLYEYSR                         |
|           |                                      | 360-371 | 1439.9565 | RHPEYAVSVLLR                          |
|           |                                      | 361-371 | 1283.8307 | HPEYAVSVLLR                           |
|           |                                      | 372-401 | 3592.0681 | LAKEYEATLEECCA KDDPHACYSTVFDKL<br>K   |
|           |                                      | 375-386 | 1501.9216 | EYEATLEECCA K                         |
|           |                                      | 402-412 | 1305.8215 | HLVDEPQNLIK                           |
|           |                                      | 402-433 | 3816.3491 | HLVDEPQNLIKQNC DQFEKLGEYGFQNALI<br>VR |
|           |                                      | 413-433 | 2529.5029 | QNC DQFEKLGEYGFQNALIVR                |
|           |                                      | 421-433 | 1479.9423 | LGEYGFQNALIVR                         |
|           |                                      | 437-451 | 1640.1062 | KVPQVSTPTLVEVSR                       |
|           |                                      | 460-482 | 2872.6367 | CCTKPESERMPCTEDYLSLILNR               |
|           |                                      | 469-482 | 1725.018  | MPCTEDYLSLILNR                        |
|           |                                      | 483-495 | 1539.9642 | LCVLHEKTPVSEK                         |
|           |                                      | 499-507 | 1138.6078 | CCTESLVNR                             |
|           |                                      | 508-523 | 1881.1206 | RPCFSALTPDETYVPK                      |
|           |                                      | 508-528 | 2471.4578 | RPCFSALTPDETYVPKAFDEK                 |
|           |                                      | 529-544 | 1908.1150 | LFTFHADICTLPDTEK                      |
|           |                                      | 18-32   | 1606.9572 | VEADIAGHGQEVLR                        |
|           |                                      | 33-43   | 1271.7151 | LFTGHPETLEK                           |
|           |                                      | 65-78   | 1378.9167 | HGTVVLTALGGILK                        |
|           |                                      | 79-97   | 2110.2502 | KKGHHEAELKPLAQSHATK                   |
|           |                                      | 80-97   | 1982.1681 | KGHHEAELKPLAQSHATK                    |
|           |                                      | 104-119 | 1885.1340 | YLEFISDAIIHVLHSK                      |
| myoglobin | Fe <sub>3</sub> O <sub>4</sub> @PMAA | 120-134 | 1502.7461 | HPGDFGADAQGAMTK                       |
|           | -trypsin                             | 120-140 | 2248.3276 | HPGDFGADAQGAMTKALELFR                 |
|           |                                      | 135-154 | 2283.349  | ALELFRNDIAAKYKELGFQG                  |
|           |                                      | 147-154 | 941.5030  | YKELGFQG                              |
|           |                                      | 1-14    | 1606.8558 | MGDVEKGKKIFVQK                        |
|           |                                      | 2-9     | 861.1061  | GDVEKGKK                              |
|           |                                      | 27-39   | 1433.8314 | HKTGPNLHGLFGR                         |
|           |                                      | 27-40   | 1561.9294 | HKTGPNLHGLFGRK                        |
|           |                                      | 29-39   | 1168.6830 | TGPNLHGLFGR                           |
|           |                                      | 29-40   | 1296.7589 | TGPNLHGLFGRK                          |
| Cyt-c     | Fe <sub>3</sub> O <sub>4</sub> @PMAA | 40-54   | 1584.8254 | KTGQAPGFSYTDANK                       |
|           | -trypsin                             | 41-54   | 1456.7263 | TGQAPGFSYTDANK                        |
|           |                                      | 57-73   | 2010.0515 | GITWGEETLMEYLENPK                     |



|        |           |                    |
|--------|-----------|--------------------|
| 57-74  | 2138.1589 | GITWGEETLMEYLENPKK |
| 89-101 | 1562.9392 | KGEREDLIAYLKK      |
| 90-100 | 1306.7384 | GEREDLIAYLK        |
| 90-101 | 1434.8387 | GEREDLIAYLKK       |
| 93-100 | 964.5387  | EDLIAYLK           |

Digestion condition: amount of  $\text{Fe}_3\text{O}_4@\text{PMAA}@\text{PEI}$  and  $\text{Fe}_3\text{O}_4@\text{PMAA}$ : 0.8mg; sample, 0.3mg/mL standard protein ; digestion temperature:  $37^\circ\text{C}$ , 10minutes ; In-solution digestion, enzyme/protein=1/50 (w/w), 24 h,  $37^\circ\text{C}$

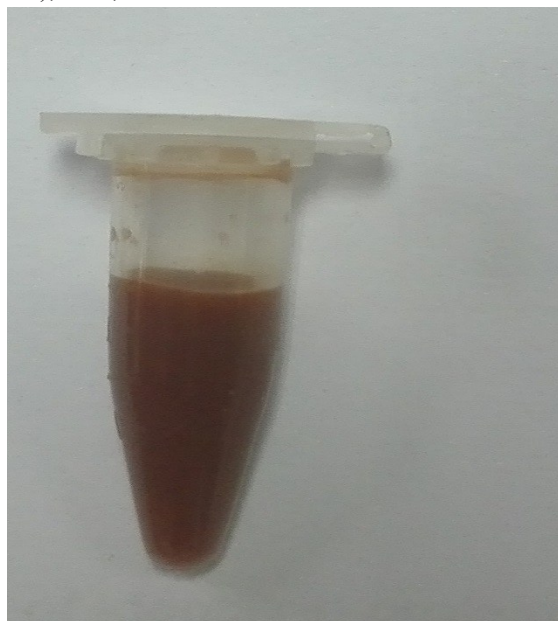

Figure. S-4. Photographic images of  $\text{Fe}_3\text{O}_4@\text{PMAA}@\text{PEI}$  dispersing in  $\text{NH}_4\text{HCO}_3$  buffer solution (pH=8.0)

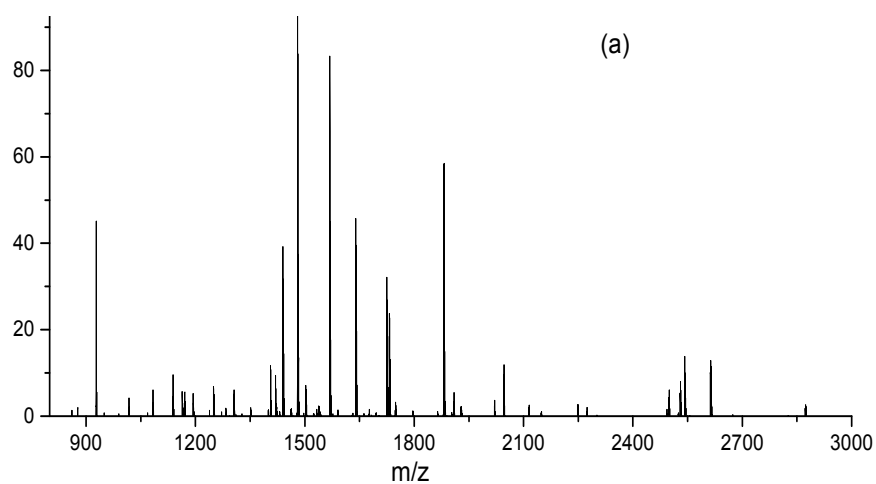

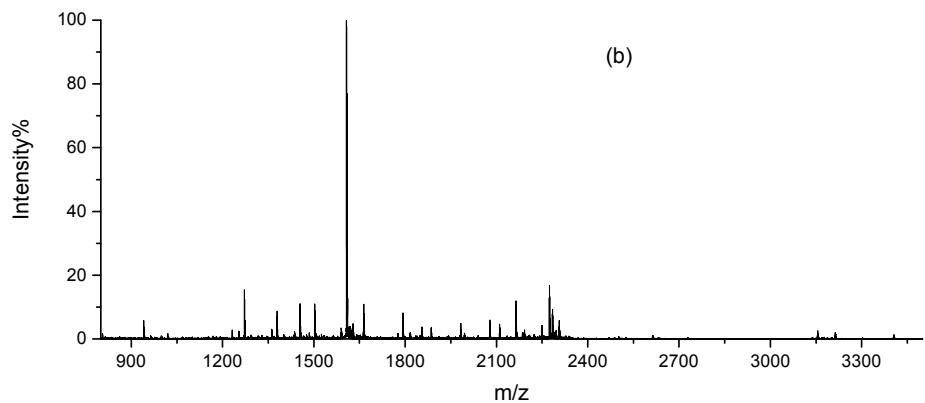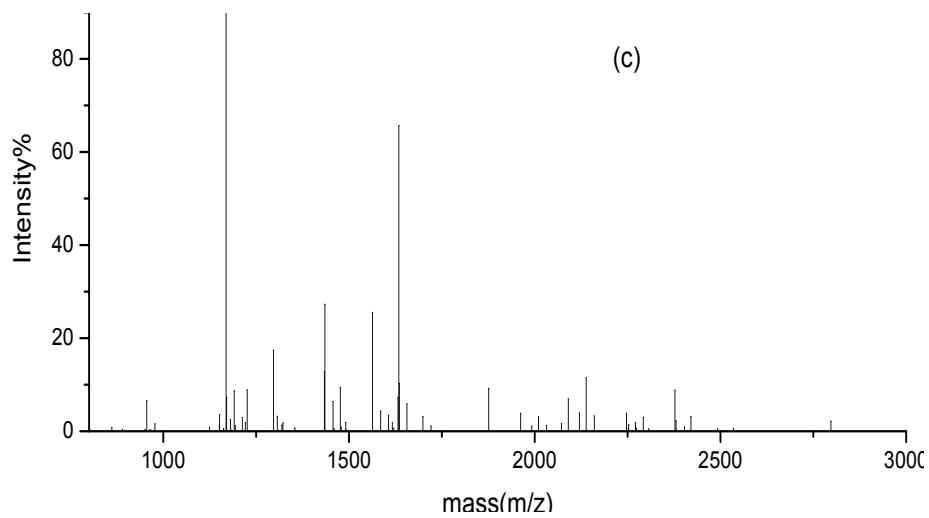

Figure S-5. MALDI-TOF/TOF mass spectra of the digests of (a) BSA (0.3mg/mL), (b) myoglobin (0.3mg/mL) and (c) Cyt-*c* (0.3mg/mL) obtained by using Fe<sub>3</sub>O<sub>4</sub>@PMAA@PEI-trypsin.
